# Supplementary material for: Learning curve for endoscopic submucosal dissection (ESD) in the United States: Large, untutored, single-operator experience
Source: PubMed Central journal article supplement — Endosc Int Open. 2024 Jul 25;12(7):E905–13. doi: 10.1055/a-2337-3865 (PMC11272410; doi:10.1055/a-2337-3865), 2024-07-25

## Supplementary material

## Supplementary sources:

Table 1. ESD outcomes for colonic cases

| Characteristic          | Overall, 217 patients (lesions=221) |
|-------------------------|-------------------------------------|
| Primary outcome         |                                     |
| En bloc resection       | 173 (87.3%)                         |
| R0 resection            | 163 (73.8%)                         |
| Curative resection      | 161 (72.9 %)                        |
| Procedure time (median) | 82 minutes                          |
| Resection speed         | 6.4 cm <sup>2</sup> /hr             |
| Specimen size in cm     |                                     |
| Specimen size length    | 2.9 ± 1.4 cm                        |
| Specimen size width     | 2.4 ± 1.1 cm                        |

Table 2: Multiple mixed effect linear regression for ESD time

|                                    | Coefficient | 95% Confidence Interval |       | p-value      |
|------------------------------------|-------------|-------------------------|-------|--------------|
| <b>Lesion length &gt; 4 cm</b>     | 31.13       | 22.51                   | 39.74 | <b>0.000</b> |
| <b>Location</b>                    |             |                         |       | 0.509        |
| <b>Esophagus</b>                   | Reference   | .                       | .     | .            |
| <b>Stomach</b>                     | 10.32       | -6.22                   | 26.86 | 0.222        |
| <b>Jejunum or duodenum</b>         | 3.26        | -13.03                  | 19.55 | 0.695        |
| <b>Colon</b>                       | 4.54        | -6.41                   | 15.48 | 0.417        |
| <b>Appendix or IC valve</b>        | 5.20        | -12.52                  | 22.91 | 0.565        |
| <b>Rectum</b>                      | 13.90       | -0.43                   | 28.23 | 0.057        |
| <b>Multiple knives</b>             | 28.65       | 18.78                   | 38.51 | <b>0.000</b> |
| <b>Fibrosis</b>                    | 19.16       | 8.87                    | 29.45 | <b>0.000</b> |
| <b>Paris IIa + IIc (vs. other)</b> | 12.52       | 2.75                    | 22.29 | <b>0.012</b> |
| <b>Use of hemostatic device</b>    | 4.17        | -8.66                   | 17.00 | 0.524        |

## Supplementary material

**Table 3: Associations with ESD time among single colonic procedures (Mixed linear regressions)**

|                                 | <b>Coefficient</b> | <b>95% Confidence Interval</b> |       | <b>p-value</b> |
|---------------------------------|--------------------|--------------------------------|-------|----------------|
| <b>Lesion length &gt; 4 cm</b>  | 26.47              | 15.88                          | 37.07 | <b>0.000</b>   |
| <b>Multiple knives used</b>     | 26.39              | 13.73                          | 39.05 | <b>0.000</b>   |
| <b>Use of hemostatic device</b> | 18.21              | -1.64                          | 38.06 | 0.072          |

**Table 4: Associations with R0 resection among single colonic procedures (multiple logistic regression for R0 resection)**

|                             | <b>Adj. OR</b> | <b>95% Confidence Interval</b> |      | <b>p-value</b> |
|-----------------------------|----------------|--------------------------------|------|----------------|
| <b>Multiple knives used</b> | 0.42           | 0.20                           | 0.90 | <b>0.025</b>   |
| <b>Fibrosis</b>             | 0.42           | 0.20                           | 0.90 | <b>0.025</b>   |

**Table 5: Multiple GEE for R0 resection**

|                      | <b>Adj. OR</b> | <b>95% Confidence Interval</b> |      | <b>p-value</b> |
|----------------------|----------------|--------------------------------|------|----------------|
| <b>Location</b>      |                |                                |      | 0.069          |
| Esophagus            | Reference      | .                              | .    | .              |
| Stomach              | 1.24           | 0.50                           | 3.03 | 0.644          |
| Jejunum or duodenum  | 0.36           | 0.17                           | 0.76 | <b>0.008</b>   |
| Colon                | 0.91           | 0.52                           | 1.57 | 0.725          |
| Appendix or IC valve | 0.58           | 0.24                           | 1.40 | 0.226          |
| Rectum               | 0.84           | 0.40                           | 1.78 | 0.652          |
| <b>Fibrosis</b>      | 0.34           | 0.21                           | 0.55 | <b>0.000</b>   |

## Supplementary material

Supplementary figure 1

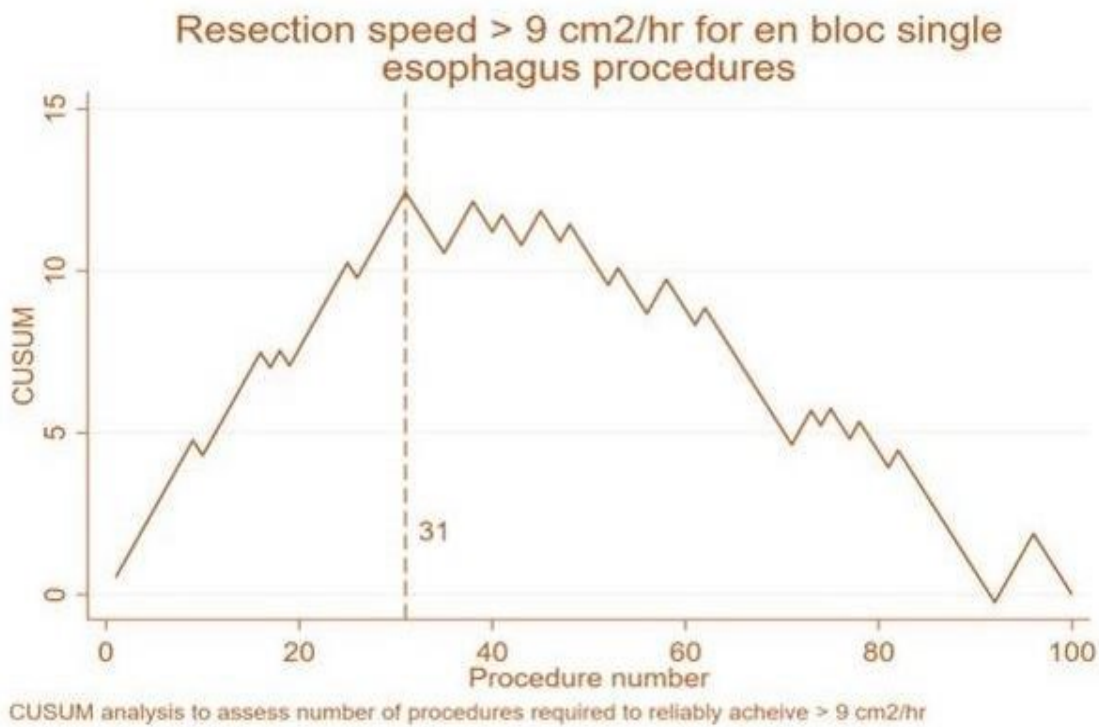

Supplementary figure 2

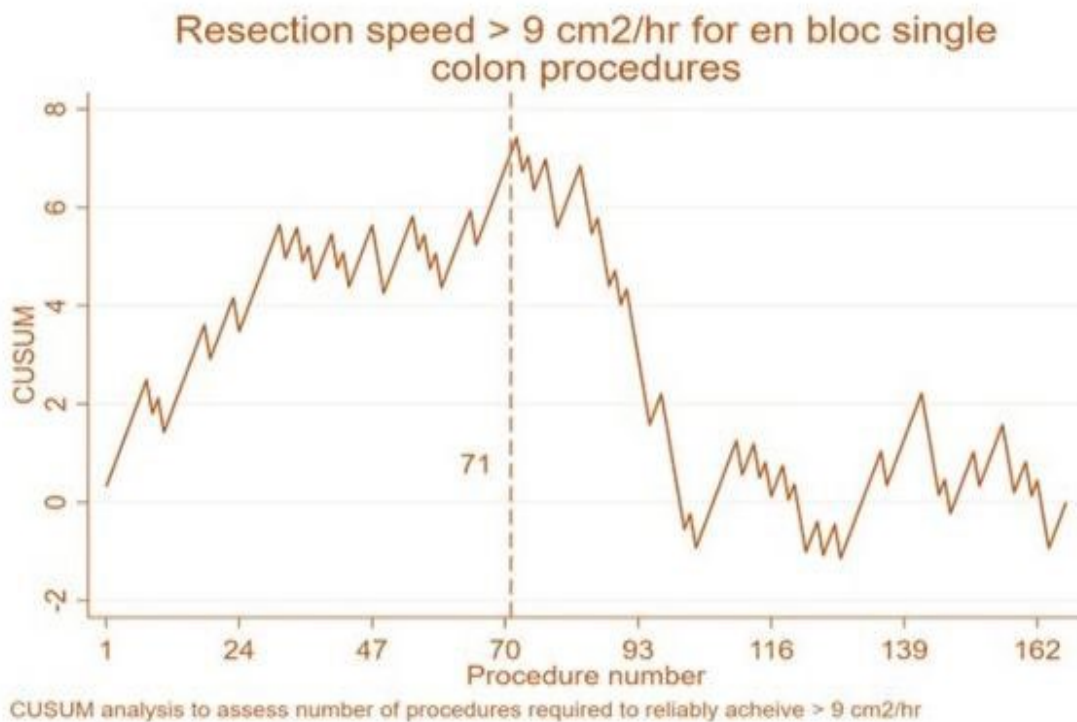

Supplement: 10-1055-a-2337-3865_23400493.pdf.pdf [file 10-1055-a-2337-3865_23400493.pdf.pdf]
